# Supplementary material
Source: publisher figshare collection journal article supplement (https://aacr.figshare.com/articles/dataset/_/22383503)
Supplement: Supplementary file 1 [file 39828920]

## **Supplementary Figure Legends**

**Supplementary Figure S1A.** Exogenous expression of Myc/His-tagged ERK2 and non-tagged CDCA5 proteins detected by western blotting in HeLa cells after EGF stimulation (50 ng/mL) for 5, 10, 20, 30 minutes. HeLa cells treated with EGF (50 ng/mL) for 30 minutes were also treated with 10  $\mu$ M of MEK inhibitor, U0126.

**Supplementary Figure S1B.** Immunoprecipitation of non-tagged CDCA5 protein using anti-CDCA5 antibody and the lysates of EGF-treated or non-treated HeLa cells that were transfected with both non-tagged CDCA5-expressing vectors and Myc/His-tagged ERK2-expressing vectors to confirm the ERK-dependent phosphorylation sites on CDCA5 in cultured cells. Colloidal CBB stain (**top**) was performed for overnight. The bands corresponding to CDCA5 protein was excised for Mass spectrometric analysis. Western blotting using anti-CDCA5 antibody showed the expression of CDCA5 protein in each input cell samples (**bottom**).
